# Supplementary material
Source: PubMed Central journal article supplement (PMC5872907)
Supplement: jamafacialplastsurg-e172296-s001.pdf [file jamafacialplastsurg-e172296-s001.pdf]

## Supplementary Online Content

Lee T. S-K, Goyal P, Li C, Zhao K. Computational fluid dynamics to evaluate the effectiveness of inferior turbinate reduction techniques to improve nasal airflow [published online January 25, 2018]. *JAMA Facial Plast Surg*. doi:10.1001/jamafacial.2017.2296

### **eTable.** CFD Data

This supplementary material has been provided by the authors to give readers additional information about their work.

| Patient 1 Models | Left Nasal Cavity Volume | Right Nasal Cavity Volume | Total Nasal Cavity Volume = Left + Right + nasopharynx | Total Flow Rate | % Change of Total Flow Rate | Location Specific Effect Ratio - Left | Location Specific Effect Ratio - Right | Location Specific Effect - Total Nasal Cavity |
|------------------|--------------------------|---------------------------|--------------------------------------------------------|-----------------|-----------------------------|---------------------------------------|----------------------------------------|-----------------------------------------------|
| Control          | 6.144                    | 9.805                     | 23.505                                                 | 216.796         |                             |                                       |                                        |                                               |
| Anterior 1/3     | 7.01                     | 10.574                    | 25.14                                                  | 228.3           | 5%                          | 8.39                                  | 5.54                                   | 7.036                                         |
| Middle 1/3       | 7.449                    | 10.872                    | 25.877                                                 | 225.544         | 4%                          | 7.13                                  | -0.52                                  | 3.688                                         |
| Posterior 1/3    | 6.693                    | 10.438                    | 24.798                                                 | 229.011         | 6%                          | 12.21                                 | 8.7                                    | 9.449                                         |
| Anterior 2/3     | 8.47                     | 11.658                    | 27.684                                                 | 253.426         | 17%                         | 8.9                                   | 8.59                                   | 8.766                                         |
| Posterior 2/3    | 8.216                    | 11.562                    | 27.445                                                 | 258.882         | 19%                         | 11.52                                 | 10.36                                  | 10.681                                        |
| Full Length      | 9.487                    | 12.431                    | 29.585                                                 | 305.817         | 41%                         | 14.93                                 | 14.88                                  | 14.641                                        |
| Patient 2 Models | Left Nasal Cavity Volume | Right Nasal Cavity Volume | Total Nasal Cavity Volume = Left + Right + nasopharynx | Total Flow Rate | % Change of Total Flow Rate | Location Specific Effect Ratio - Left | Location Specific Effect Ratio - Right | Location Specific Effect - Total Nasal Cavity |
| Control          | 5.671                    | 9.574                     | 20.569                                                 | 232.863         |                             |                                       |                                        |                                               |
| Anterior 1/3     | 6.044                    | 10.079                    | 21.446                                                 | 234.221         | 1%                          | 9.04                                  | -4.02                                  | 1.55                                          |
| Middle 1/3       | 6.324                    | 9.957                     | 21.605                                                 | 237.8           | 2%                          | 7.27                                  | 0.45                                   | 4.77                                          |
| Posterior 1/3    | 6.585                    | 10.234                    | 22.258                                                 | 238.323         | 2%                          | 1.69                                  | 5.95                                   | 3.23                                          |
| Anterior 2/3     | 6.698                    | 10.461                    | 22.483                                                 | 240.727         | 3%                          | 10.18                                 | -2.93                                  | 4.11                                          |
| Posterior 2/3    | 7.238                    | 10.616                    | 23.294                                                 | 244.303         | 5%                          | 4.95                                  | 3.53                                   | 4.2                                           |
| Full Length      | 7.612                    | 11.121                    | 24.172                                                 | 255.742         | 10%                         | 8.61                                  | 3.99                                   | 6.35                                          |
| Patient 3 Models | Left Nasal Cavity Volume | Right Nasal Cavity Volume | Total Nasal Cavity Volume = Left + Right + nasopharynx | Total Flow Rate | % Change of Total Flow Rate | Location Specific Effect Ratio - Left | Location Specific Effect Ratio - Right | Location Specific Effect - Total Nasal Cavity |
| Control          | 7.075                    | 9.544                     | 21.856                                                 | 110.059         |                             |                                       |                                        |                                               |
| Anterior 1/3     | 7.777                    | 10.038                    | 23.051                                                 | 119.426         | 9%                          | 13.2                                  | 0.2                                    | 7.84                                          |
| Middle 1/3       | 7.843                    | 10.218                    | 23.297                                                 | 120.072         | 1%                          | 16.92                                 | -4.43                                  | 6.94                                          |

|                         |                                 |                                  |                                                               |                        |                                    |                                              |                                               |                                                      |
|-------------------------|---------------------------------|----------------------------------|---------------------------------------------------------------|------------------------|------------------------------------|----------------------------------------------|-----------------------------------------------|------------------------------------------------------|
| <b>Posterior 1/3</b>    | 7.673                           | 9.912                            | 22.821                                                        | 111.352                | 19%                                | 1.63                                         | 0.87                                          | 1.34                                                 |
| <b>Anterior 2/3</b>     | 8.447                           | 10.716                           | 24.399                                                        | 130.807                | 13%                                | 20.02                                        | -5.73                                         | 8.16                                                 |
| <b>Posterior 2/3</b>    | 8.358                           | 10.51                            | 24.103                                                        | 124.579                | 30%                                | 15.13                                        | -5.05                                         | 6.46                                                 |
| <b>Full Length</b>      | 8.971                           | 10.939                           | 25.145                                                        | 142.623                | 9%                                 | 23.92                                        | -9.16                                         | 9.9                                                  |
| <b>Patient 4 Models</b> | <b>Left Nasal Cavity Volume</b> | <b>Right Nasal Cavity Volume</b> | <b>Total Nasal Cavity Volume = Left + Right + nasopharynx</b> | <b>Total Flow Rate</b> | <b>% Change of Total Flow Rate</b> | <b>Location Specific Effect Ratio - Left</b> | <b>Location Specific Effect Ratio - Right</b> | <b>Location Specific Effect - Total Nasal Cavity</b> |
| <b>Control</b>          | 6.606                           | 7.042                            | 18.998                                                        | 112.27                 |                                    |                                              |                                               |                                                      |
| <b>Anterior 1/3</b>     | 7.338                           | 7.913                            | 20.601                                                        | 123.305                | 10%                                | 5.41                                         | 8.12                                          | 6.88                                                 |
| <b>Middle 1/3</b>       | 7.999                           | 8.318                            | 21.668                                                        | 130.662                | 16%                                | 4.64                                         | 9.34                                          | 6.89                                                 |
| <b>Posterior 1/3</b>    | 7.455                           | 7.931                            | 20.929                                                        | 147.75                 | 32%                                | 25.96                                        | 15.1                                          | 18.38                                                |
| <b>Anterior 2/3</b>     | 8.749                           | 9.191                            | 23.29                                                         | 158.555                | 41%                                | 7.02                                         | 14.54                                         | 10.78                                                |
| <b>Posterior 2/3</b>    | 8.776                           | 9.142                            | 23.461                                                        | 192.96                 | 72%                                | 20.57                                        | 17.16                                         | 18.08                                                |
| <b>Full Length</b>      | 9.523                           | 10.017                           | 25.083                                                        | 275.483                | 145%                               | 27.65                                        | 27.75                                         | 26.82                                                |
| <b>Patient 5 Models</b> | <b>Left Nasal Cavity Volume</b> | <b>Right Nasal Cavity Volume</b> | <b>Total Nasal Cavity Volume = Left + Right + nasopharynx</b> | <b>Total Flow Rate</b> | <b>% Change of Total Flow Rate</b> | <b>Location Specific Effect Ratio - Left</b> | <b>Location Specific Effect Ratio - Right</b> | <b>Location Specific Effect - Total Nasal Cavity</b> |
| <b>Control</b>          | 9.84                            | 9.029                            | 36.512                                                        | 297.159                |                                    |                                              |                                               |                                                      |
| <b>Anterior 1/3</b>     | 10.564                          | 9.736                            | 37.942                                                        | 325.397                | 10%                                | 11.64                                        | 28.03                                         | 19.74                                                |
| <b>Middle 1/3</b>       | 10.594                          | 10.085                           | 38.322                                                        | 321.977                | 8%                                 | 14.69                                        | 13.01                                         | 13.71                                                |
| <b>Posterior 1/3</b>    | 10.399                          | 9.837                            | 38.18                                                         | 307.64                 | 4%                                 | 7.16                                         | 8.03                                          | 6.28                                                 |
| <b>Anterior 2/3</b>     | 11.318                          | 10.778                           | 39.739                                                        | 370.689                | 25%                                | 16.94                                        | 27.73                                         | 22.79                                                |
| <b>Posterior 2/3</b>    | 11.15                           | 10.87                            | 39.964                                                        | 351.524                | 18%                                | 18.36                                        | 16.48                                         | 15.75                                                |
| <b>Full Length</b>      | 11.884                          | 11.572                           | 41.401                                                        | 426.123                | 43%                                | 22.06                                        | 32.99                                         | 26.38                                                |

eTable. CFD Data - Manipulated partial ITR models were compared to their respective control models for each patient. Total nasal cavity volume includes the left and the right nasal cavity volumes and the nasopharynx volume, which were not affected in all ITRs.

The nasal air flow rate in ml/second is simulated under restful breathing. % change of total flow rate reports a percentage change in flow rate when compared to the control model. A positive percentage indicates increase in nasal airflow when compared to the control model. The location-specific effect was identified using a ratio calculated by dividing the change in nasal airflow rate from the control model by the change in nasal cavity volume from the control model. A high ratio indicates the inferior turbinate reduction at the particular location is more effective at increasing the nasal airflow. A negative ratio indicates the ITR at the particular location of the inferior turbinate worsened nasal airflow. The location specific effects for the left nasal cavity, right nasal cavity and total nasal cavity (left + right nasal cavity combined) are reported. One can note, the site of most effective partial ITR sometimes differ from one side to the other within same individuals (i.e. Patient 2,3 & 5 when comparing the one-third length partial ITR models).
